# Supplementary figures and images for: Antibacterial and Antibiofilm Activities of Β –Lapachone by Modulating the Catalase Enzyme
Source: Preprints.org preprint supplement (doi:10.20944/preprints202301.0540.v1), 2023-01-30

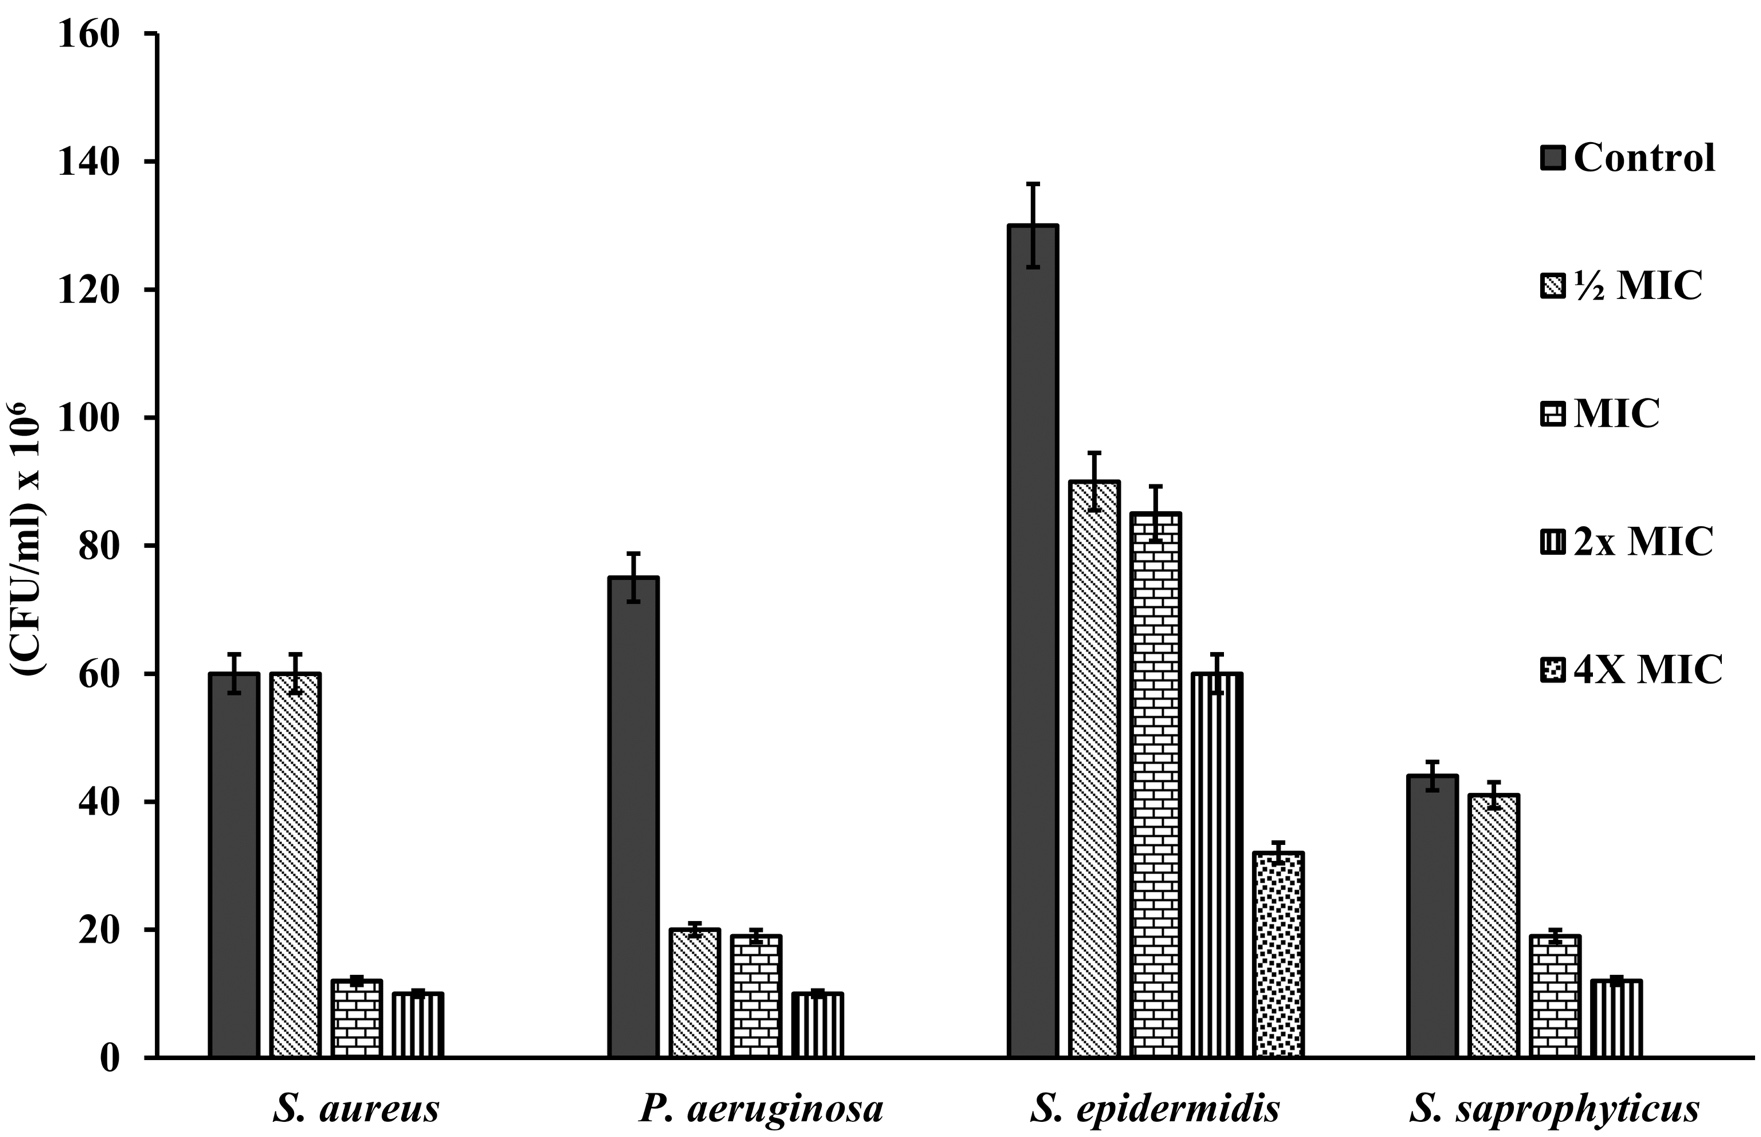


Supp. Fig. 1


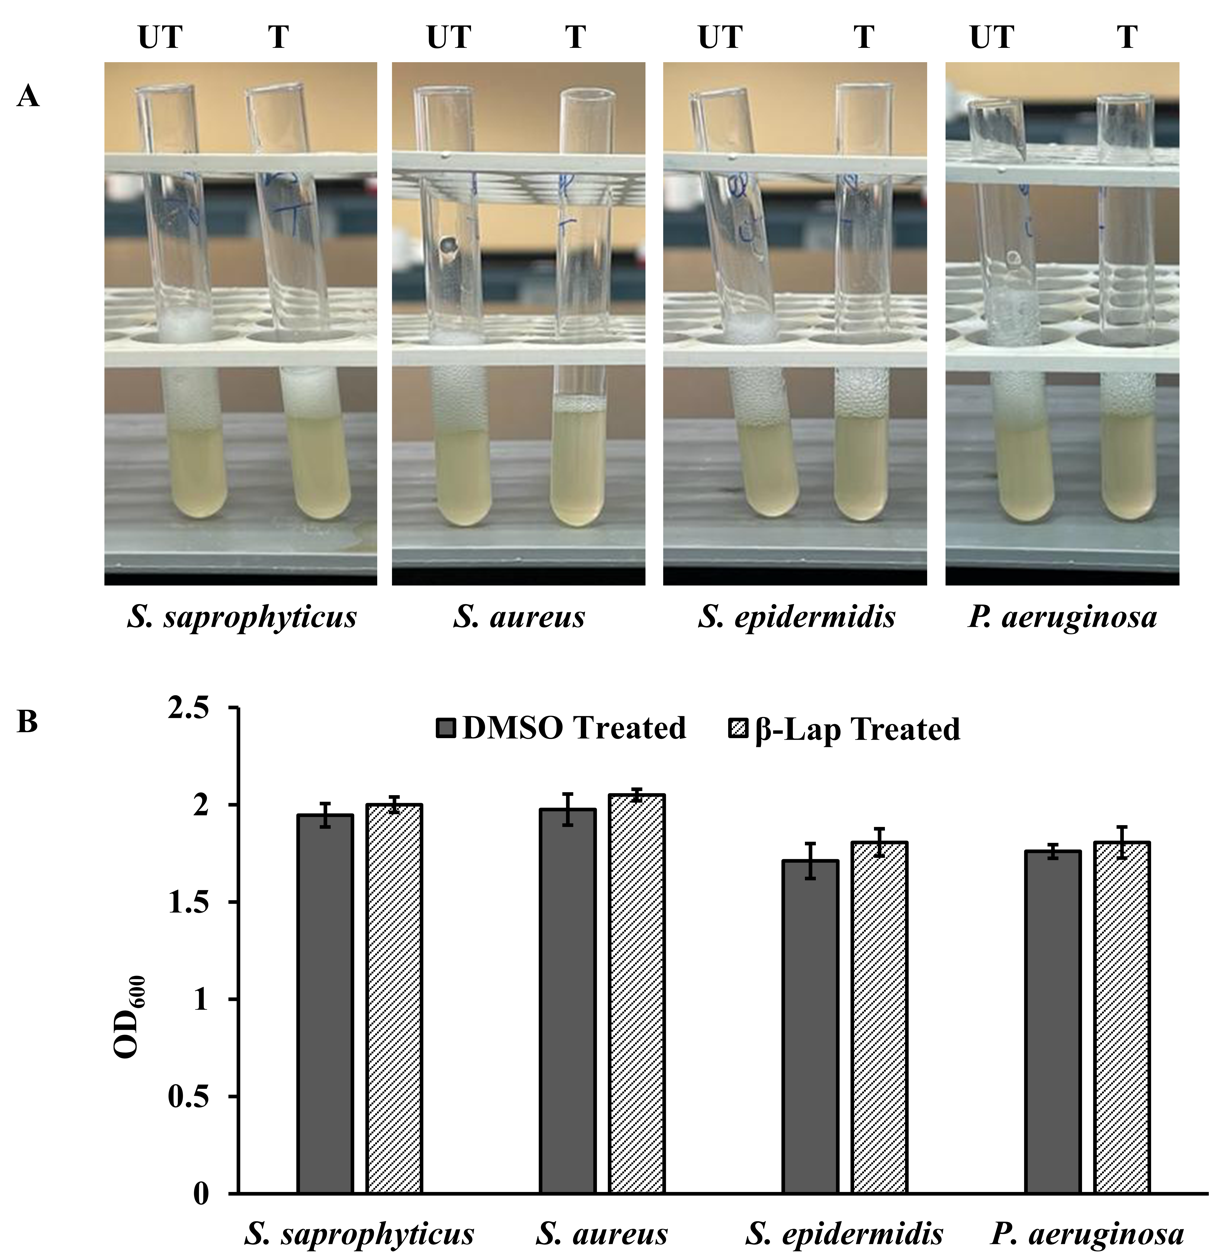

Suppl. Fig.2


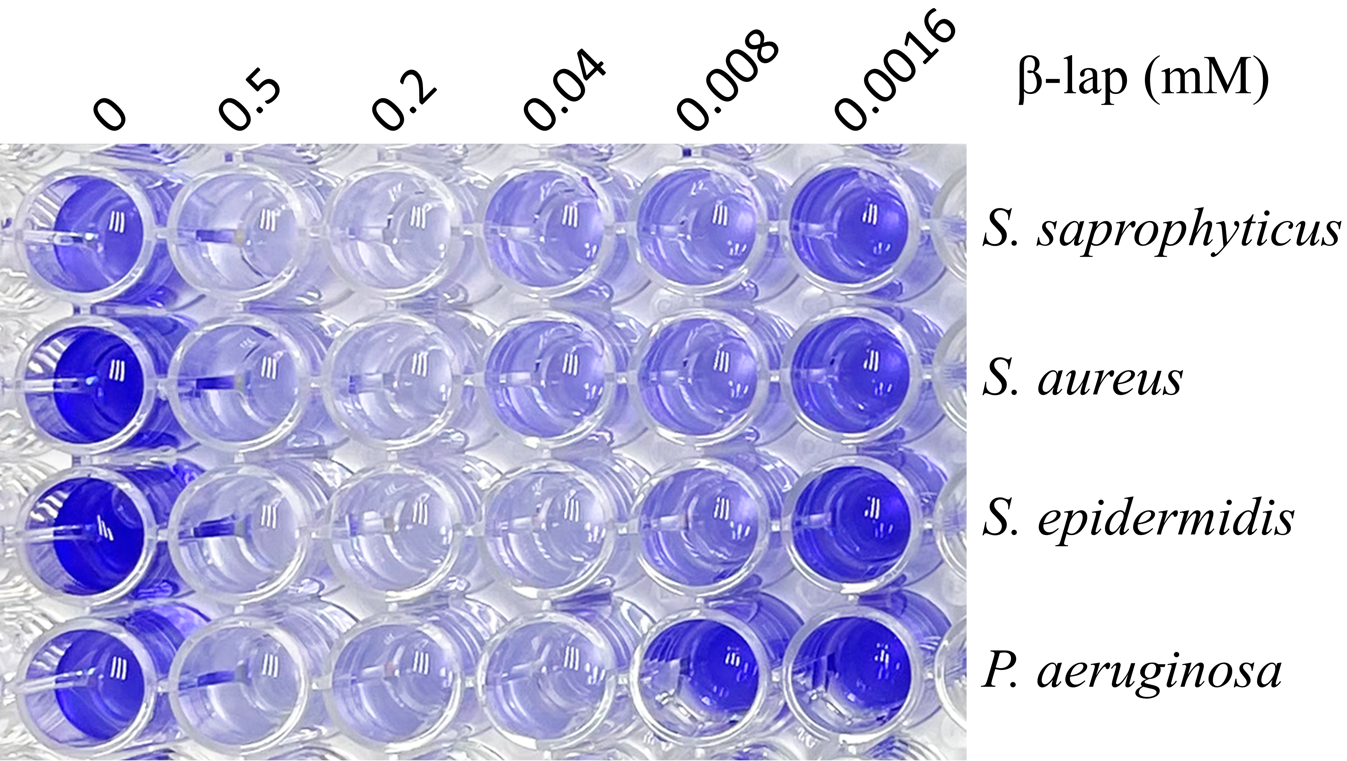


Suppl. Fig. 3

Supplement: Supplementary file 3 [file supplementary]
